# Supplementary material for: Motivation to Have COVID-19 Vaccination Explained Using an Extended Protection Motivation Theory among University Students in China: The Role of Information Sources
Source: MDPI journal article supplement (doi:10.3390/vaccines9040380), 2021-04-13
Supplement: s1 [file s1]

**Table S1.** Results of the structural equation modeling investigating the proposed model (participants with a health-related major).

| IV                                | Mediator          | DV                      | Coeff. (SE)    | Stand. Coeff. | t-value | p-value |
|-----------------------------------|-------------------|-------------------------|----------------|---------------|---------|---------|
| Perceived severity                |                   | Motivation              | 0.204 (0.617)  | 0.204         | 0.330   | 0.741   |
| Perceived vulnerability           |                   | Motivation              | 0.004 (1.284)  | 0.004         | 0.003   | 0.997   |
| Internet <sup>a</sup>             | Self-efficacy     |                         | 0.100 (0.203)  | 0.100         | 0.494   | 0.621   |
| Traditional media <sup>a</sup>    | Self-efficacy     |                         | -0.125 (0.160) | -0.125        | -0.783  | 0.434   |
| Friends <sup>a</sup>              | Self-efficacy     |                         | -0.063 (0.189) | -0.063        | -0.334  | 0.738   |
| Family <sup>a</sup>               | Self-efficacy     |                         | 0.027 (0.149)  | 0.027         | 0.182   | 0.856   |
| Coworkers/classmates <sup>a</sup> | Self-efficacy     |                         | -0.017 (0.152) | -0.017        | -0.114  | 0.909   |
| On-site training <sup>a</sup>     | Self-efficacy     |                         | 0.091 (0.209)  | 0.091         | 0.436   | 0.663   |
| Medical personnel <sup>a</sup>    | Self-efficacy     |                         | 0.182 (0.191)  | 0.182         | 0.956   | 0.339   |
| Internet <sup>a</sup>             | Response efficacy |                         | 0.041 (0.224)  | 0.041         | 0.183   | 0.855   |
| Traditional media <sup>a</sup>    | Response efficacy |                         | 0.084 (0.129)  | 0.084         | 0.655   | 0.513   |
| Friends <sup>a</sup>              | Response efficacy |                         | -0.115 (0.189) | -0.115        | -0.609  | 0.543   |
| Family <sup>a</sup>               | Response efficacy |                         | 0.014 (0.131)  | 0.014         | 0.110   | 0.912   |
| Coworkers/classmates <sup>a</sup> | Response efficacy |                         | 0.109 (0.149)  | 0.109         | 0.735   | 0.462   |
| On-site training <sup>a</sup>     | Response efficacy |                         | -0.016 (0.136) | -0.016        | -0.119  | 0.905   |
| Medical personnel <sup>a</sup>    | Response efficacy |                         | 0.114 (0.130)  | 0.114         | 0.874   | 0.382   |
| Internet <sup>a</sup>             | Response cost     |                         | -0.101 (0.198) | -0.101        | -0.510  | 0.610   |
| Traditional media <sup>a</sup>    | Response cost     |                         | -0.124 (0.143) | -0.124        | -0.863  | 0.388   |
| Friends <sup>a</sup>              | Response cost     |                         | 0.085 (0.187)  | 0.085         | 0.454   | 0.649   |
| Family <sup>a</sup>               | Response cost     |                         | 0.070 (0.165)  | 0.070         | 0.421   | 0.673   |
| Coworkers/classmates <sup>a</sup> | Response cost     |                         | 0.267 (0.179)  | 0.267         | 1.496   | 0.134   |
| On-site training <sup>a</sup>     | Response cost     |                         | 0.029 (0.144)  | 0.029         | 0.201   | 0.841   |
| Medical personnel <sup>a</sup>    | Response cost     |                         | -0.051 (0.134) | -0.051        | -0.377  | 0.706   |
| Internet <sup>a</sup>             | Knowledge         |                         | -0.221 (0.214) | -0.221        | -1.031  | 0.302   |
| Traditional media <sup>a</sup>    | Knowledge         |                         | -0.005 (0.132) | -0.005        | -0.039  | 0.968   |
| Friends <sup>a</sup>              | Knowledge         |                         | 0.078 (0.195)  | 0.078         | 0.401   | 0.688   |
| Family <sup>a</sup>               | Knowledge         |                         | -0.086 (0.131) | -0.086        | -0.661  | 0.508   |
| Coworkers/classmates <sup>a</sup> | Knowledge         |                         | 0.179 (0.168)  | 0.179         | 1.065   | 0.286   |
| On-site training <sup>a</sup>     | Knowledge         |                         | 0.024 (0.153)  | 0.024         | 0.160   | 0.872   |
| Medical personnel <sup>a</sup>    | Knowledge         |                         | 0.116 (0.130)  | 0.116         | 0.897   | 0.369   |
|                                   | Self-efficacy     | Motivation <sup>b</sup> | 0.427 (1.366)  | 0.427         | 0.313   | 0.754   |
|                                   | Response efficacy | Motivation <sup>b</sup> | -0.037 (3.383) | -0.037        | -0.011  | 0.991   |
|                                   | Response cost     | Motivation <sup>b</sup> | -0.207 (0.126) | -0.207        | -1.645  | 0.100   |
|                                   | Knowledge         | Motivation <sup>b</sup> | 0.111 (1.588)  | 0.111         | 0.070   | 0.944   |

<sup>a</sup> COVID-19 information sources; <sup>b</sup> Motivation to COVID-19 vaccination; IV = independent variable; DV = dependent variable; Coeff. = coefficient; SE = standard error; Stand. Coeff. = standardized coefficient.

**Table S2.** Results of the structural equation modeling investigating the proposed model (participants with a non-health-related major).

| IV                                | Mediator          | DV         | Coeff. (SE)          | Stand. Coeff. | t-value      | p-value          |
|-----------------------------------|-------------------|------------|----------------------|---------------|--------------|------------------|
| Perceived severity                |                   | Motivation | <b>0.190 (0.031)</b> | <b>0.190</b>  | <b>6.179</b> | <b>&lt;0.001</b> |
| Perceived vulnerability           |                   | Motivation | -0.001 (0.024)       | -0.001        | -0.024       | 0.981            |
| Internet <sup>a</sup>             | Self-efficacy     |            | -0.006 (0.051)       | -0.006        | -0.127       | 0.898            |
| Traditional media <sup>a</sup>    | Self-efficacy     |            | 0.059 (0.043)        | 0.059         | 1.389        | 0.164            |
| Friends <sup>a</sup>              | Self-efficacy     |            | 0.086 (0.066)        | 0.086         | 1.308        | 0.191            |
| Family <sup>a</sup>               | Self-efficacy     |            | -0.016 (0.058)       | -0.016        | -0.272       | 0.786            |
| Coworkers/classmates <sup>a</sup> | Self-efficacy     |            | -0.055 (0.056)       | -0.055        | -0.974       | 0.330            |
| On-site training <sup>a</sup>     | Self-efficacy     |            | 0.008 (0.050)        | 0.008         | 0.168        | 0.867            |
| Medical personnel <sup>a</sup>    | Self-efficacy     |            | <b>0.110 (0.047)</b> | <b>0.110</b>  | <b>2.332</b> | <b>0.019</b>     |
| Internet <sup>a</sup>             | Response efficacy |            | 0.067 (0.037)        | 0.067         | 1.815        | 0.069            |
| Traditional media <sup>a</sup>    | Response efficacy |            | 0.034 (0.036)        | 0.034         | 0.941        | 0.346            |
| Friends <sup>a</sup>              | Response efficacy |            | 0.046 (0.055)        | 0.046         | 0.851        | 0.394            |

|                                   |                   |                         |                       |               |               |                  |
|-----------------------------------|-------------------|-------------------------|-----------------------|---------------|---------------|------------------|
| Family <sup>a</sup>               | Response efficacy |                         | -0.015 (0.048)        | -0.015        | -0.304        | 0.761            |
| Coworkers/classmates <sup>a</sup> | Response efficacy |                         | <b>-0.107 (0.046)</b> | <b>-0.107</b> | <b>-2.305</b> | <b>0.021</b>     |
| On-site training <sup>a</sup>     | Response efficacy |                         | 0.026 (0.043)         | 0.026         | 0.614         | 0.539            |
| Medical personnel <sup>a</sup>    | Response efficacy |                         | <b>0.147 (0.039)</b>  | <b>0.147</b>  | <b>3.767</b>  | <b>&lt;0.001</b> |
| Internet <sup>a</sup>             | Response cost     |                         | <b>0.165 (0.048)</b>  | <b>0.165</b>  | <b>3.414</b>  | <b>&lt;0.001</b> |
| Traditional media <sup>a</sup>    | Response cost     |                         | -0.038 (0.040)        | -0.038        | -0.944        | 0.345            |
| Friends <sup>a</sup>              | Response cost     |                         | 0.063 (0.062)         | 0.063         | 1.022         | 0.306            |
| Family <sup>a</sup>               | Response cost     |                         | -0.100 (0.052)        | -0.100        | -1.934        | 0.053            |
| Coworkers/classmates <sup>a</sup> | Response cost     |                         | 0.018 (0.057)         | 0.018         | 0.308         | 0.758            |
| On-site training <sup>a</sup>     | Response cost     |                         | <b>0.184 (0.050)</b>  | <b>0.184</b>  | <b>3.705</b>  | <b>&lt;0.001</b> |
| Medical personnel <sup>a</sup>    | Response cost     |                         | -0.031 (0.043)        | -0.031        | -0.725        | 0.468            |
| Internet <sup>a</sup>             | Knowledge         |                         | <b>-0.228 (0.037)</b> | <b>-0.228</b> | <b>-6.155</b> | <b>&lt;0.001</b> |
| Traditional media <sup>a</sup>    | Knowledge         |                         | <b>0.107 (0.034)</b>  | <b>0.107</b>  | <b>3.193</b>  | <b>&lt;0.001</b> |
| Friends <sup>a</sup>              | Knowledge         |                         | 0.077 (0.052)         | 0.077         | 1.498         | 0.134            |
| Family <sup>a</sup>               | Knowledge         |                         | 0.038 (0.044)         | 0.038         | 0.874         | 0.382            |
| Coworkers/classmates <sup>a</sup> | Knowledge         |                         | <b>-0.118 (0.045)</b> | <b>-0.118</b> | <b>-2.608</b> | <b>0.009</b>     |
| On-site training <sup>a</sup>     | Knowledge         |                         | <b>0.133 (0.043)</b>  | <b>0.133</b>  | <b>3.121</b>  | <b>&lt;0.001</b> |
| Medical personnel <sup>a</sup>    | Knowledge         |                         | <b>0.097 (0.038)</b>  | <b>0.097</b>  | <b>2.563</b>  | <b>0.010</b>     |
|                                   | Self-efficacy     | Motivation <sup>b</sup> | 0.116 (0.357)         | 0.116         | 0.325         | 0.745            |
|                                   | Response efficacy | Motivation <sup>b</sup> | 0.544 (0.837)         | 0.544         | 0.650         | 0.515            |
|                                   | Response cost     | Motivation <sup>b</sup> | -0.007 (0.029)        | -0.007        | -0.253        | 0.800            |
|                                   | Knowledge         | Motivation <sup>b</sup> | -0.181 (0.351)        | -0.181        | -0.516        | 0.605            |

<sup>a</sup> COVID-19 information sources; <sup>b</sup> Motivation to COVID-19 vaccination; IV = independent variable; DV = dependent variable; Coeff. = coefficient; SE = standard error; Stand. Coeff. = standardized coefficient. Significant values are in **bold**.
